# Supplementary material
Source: Springer Nature journal article supplement (https://www.springermedizin.de/resource/supplementary/13048_2014_240_MOESM4_ESM.pdf/9665188)

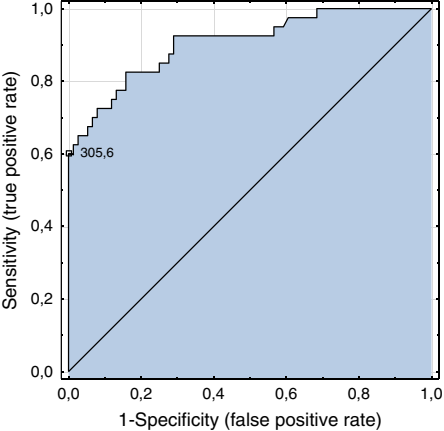

HE4 serum, AUC= 0.906 ; n=139

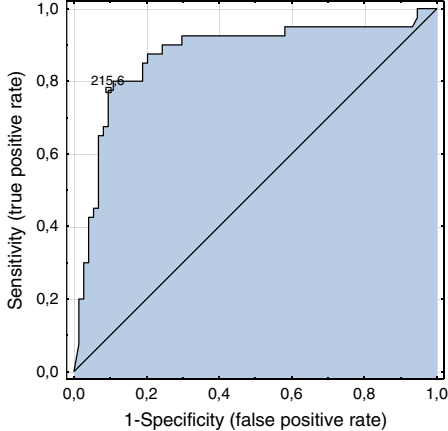

CA 125 serum, AUC=0.871; n=139

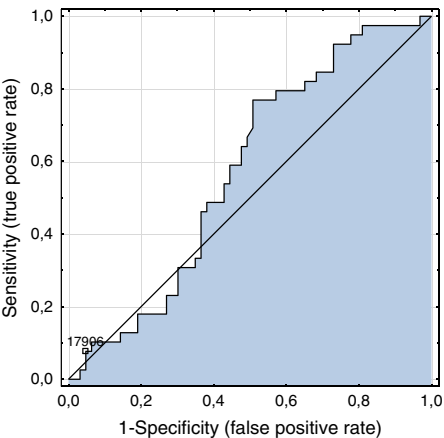

HE4 peritoneal fluid, AUC=0.575 ; n=119

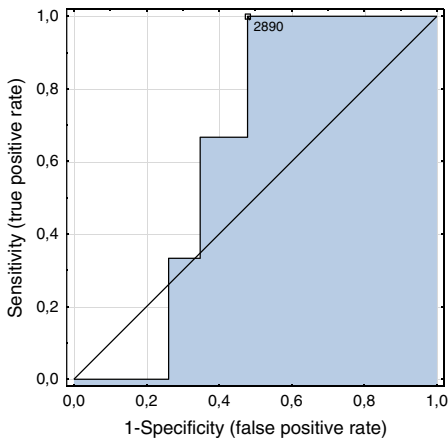

HE4 tumor/cyst fluid, AUC=0.638 ; n=27

Supplement: MOESM4 [file 9665188]
